# Supplementary material for: Otx2 and Oct4 Drive Early Enhancer Activation during Embryonic Stem Cell Transition from Naive Pluripotency
Source: PubMed Central journal article supplement — Cell Rep. 2014 Jun 12;7(6):1968–81. doi: 10.1016/j.celrep.2014.05.037 (PMC4074343; doi:10.1016/j.celrep.2014.05.037), 2014-06-12
Supplement: mmc1.pdf [file mmc1.pdf]

Cell Reports, Volume 7

Supplemental Information

**Otx2 and Oct4 Drive Early Enhancer Activation  
during Embryonic Stem Cell Transition  
from Naive Pluripotency**

Shen-Hsi Yang, Tüzer Kalkan, Claire Morissroe, Hendrik Marks, Hendrik  
Stunnenberg, Austin Smith, and Andrew D. Sharrocks

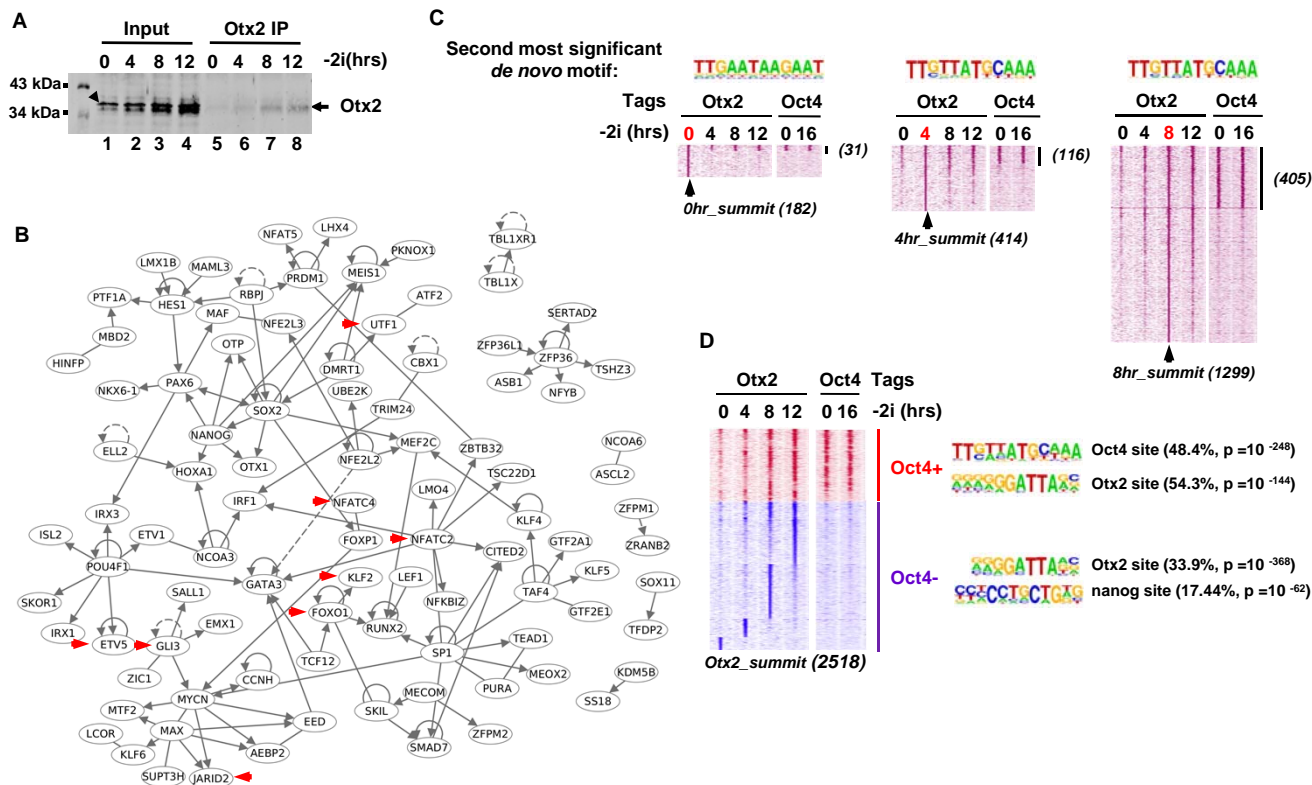

**Figure S1 (related to Figure 1). Otx2 and Oct4 bind similar regulatory regions.** (A) Western blot of Otx2 immunoprecipitation used in ChIP-seq experiments over a 12 hours time course following release from pluripotency (-2i) in *Rex1GFPd2* mESC cells. 1% input sample (lanes 1-4) and 10% of immunoprecipitated material (lanes 5-8) are shown. The arrowhead marks the position of a non-specific cross-reacting band in the input samples. (B) Ingenuity pathway analysis of genes associated with all of the Otx2 binding regions (see Fig. S1D) reveals a network of interacting transcriptional regulators. Arrows indicate genes that were identified in a genome-wide siRNA screen for factors involved in promoting escape from pluripotency (Yang et al., 2012). (C) Heat map of normalised Otx2 and Oct4 tag densities at the indicated times following release from pluripotency (-2i), plotted onto 4 kb regions centred on the Otx2 peak summits that time point (indicated in red). The numbers of regions bound by Otx2 at each time point are given in brackets. Data are partitioned based on whether there is co-occurrence of Otx2 and Oct4 binding (Otx2+/Oct4+; top) or Otx2 binding alone (Otx2+/Oct4-; bottom). The second most significant *de novo* motif discovered in the Otx2 binding regions at each of the time points are shown above the heat maps and in each case resembles the Oct4 consensus site. (D) Heat maps of normalised Otx2 and Oct4 tag densities at the indicated times following release from pluripotency (-2i) and is plotted for 1 kb either side on the union set of all Otx2 peak summits across all timepoints. The total number of regions bound by Otx2 is given in brackets. Data are partitioned based on whether there is co-occurrence of Otx2 and Oct4 binding (Otx2+/Oct4+) or Otx2 binding alone (Otx2+/Oct4-). The two most significant *de novo* motifs discovered in the Otx2+/Oct4+ (top) or Otx2+/Oct4- (bottom) binding regions at each of the time points are shown to the right.

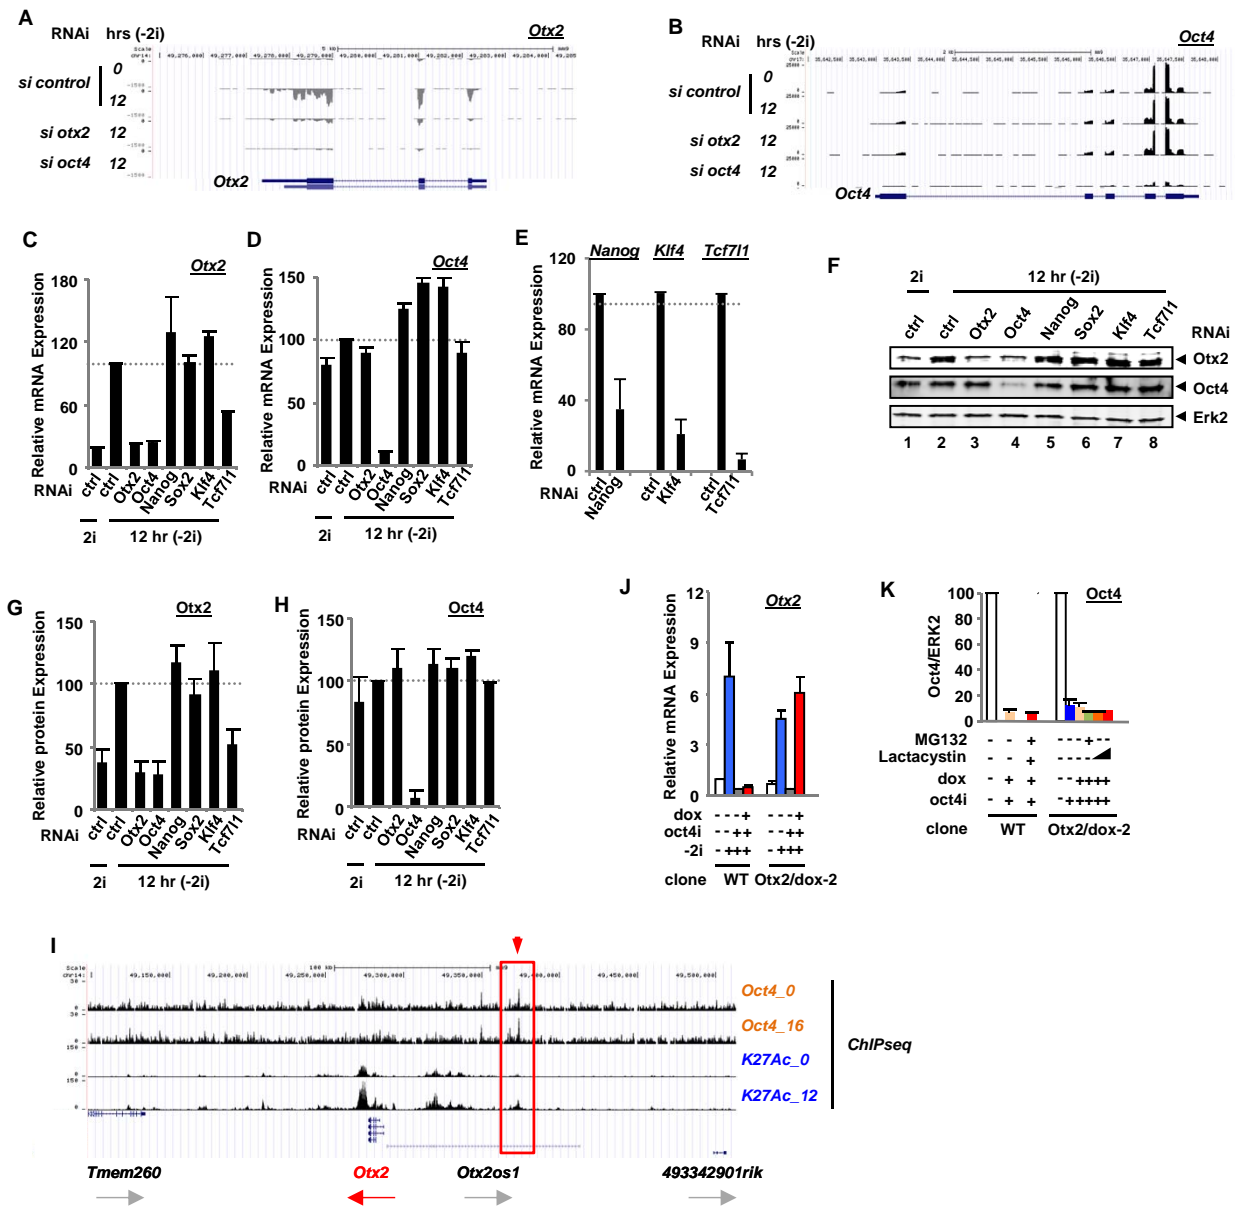

**Figure S2 (related to Figure 2). Interplay between Oct4 and Otx2 expression.** (A & B) UCSC genome browser view of RNAseq tags associated with the *Otx2* (A) or *Oct4* (B) locus. Data are shown for the indicated times following release from 2i and treatment with control (ctrl) or the indicated RNAi duplexes. (C-E) RT-qPCR analysis of mRNA expression of the indicated genes (above each graph) after knockdown of the pluripotency associated genes, as indicated, or in the presence of a non-targeting control siRNA (ctrl) at 12 hours following “2i” withdrawal in mouse ES cells (*Rex1GFPd2*). Data are normalised by the geometric mean of two reference genes (*Ppia* and *Gapdh*) and are presented as means  $\pm$  SEM and are the average of at least three biological replicates ( $n \geq 3$ ). (F) Representative immunoblots showing Otx2 and Oct4 levels at the indicated time of “2i” withdrawal following the depletion of indicated pluripotency associated genes. Quantification of the data from (F) is shown in (G; Otx2) and (H; Oct4) and are normalised for Erk2 levels and presented as means  $\pm$  SEM ( $n=3$ ). (I) UCSC genome browser views of Oct4 and H3K27Ac binding profiles associated with the region surrounding the *Otx2* locus. An Oct4 binding region exhibiting enhanced H3K27Ac levels upon release from 2i is boxed. (J) RT-qPCR analysis of mRNA expression of *Otx2* levels in (*Rex1GFPd2*) mESCs and a clonally derived cell line containing a doxycyclin-inducible *Otx2* transgene, *Otx2/dox-2*, from “2i” for 12 hrs. Data are normalised by the geometric mean of two reference genes (*Ppia* and *Gapdh*) and are presented as means  $\pm$  SEM and are the average of three biological replicates ( $n=3$ ). (K) Quantification of Western blot (see Fig. 2G) of Oct4 levels upon release of WT (*Rex1GFPd2*) mESCs and a clonally derived cell line containing a doxycyclin-inducible *Otx2* transgene, *Otx2/dox-2*, from “2i” for 12 hrs. *Oct4* depletion (oct4i), the presence (+) or absence (-) of doxycycline (dox) and the proteasome inhibitors, lactacystin and MG132, are indicated. Data are normalised for Erk2 levels and presented as means  $\pm$  SEM ( $n=2$ ).

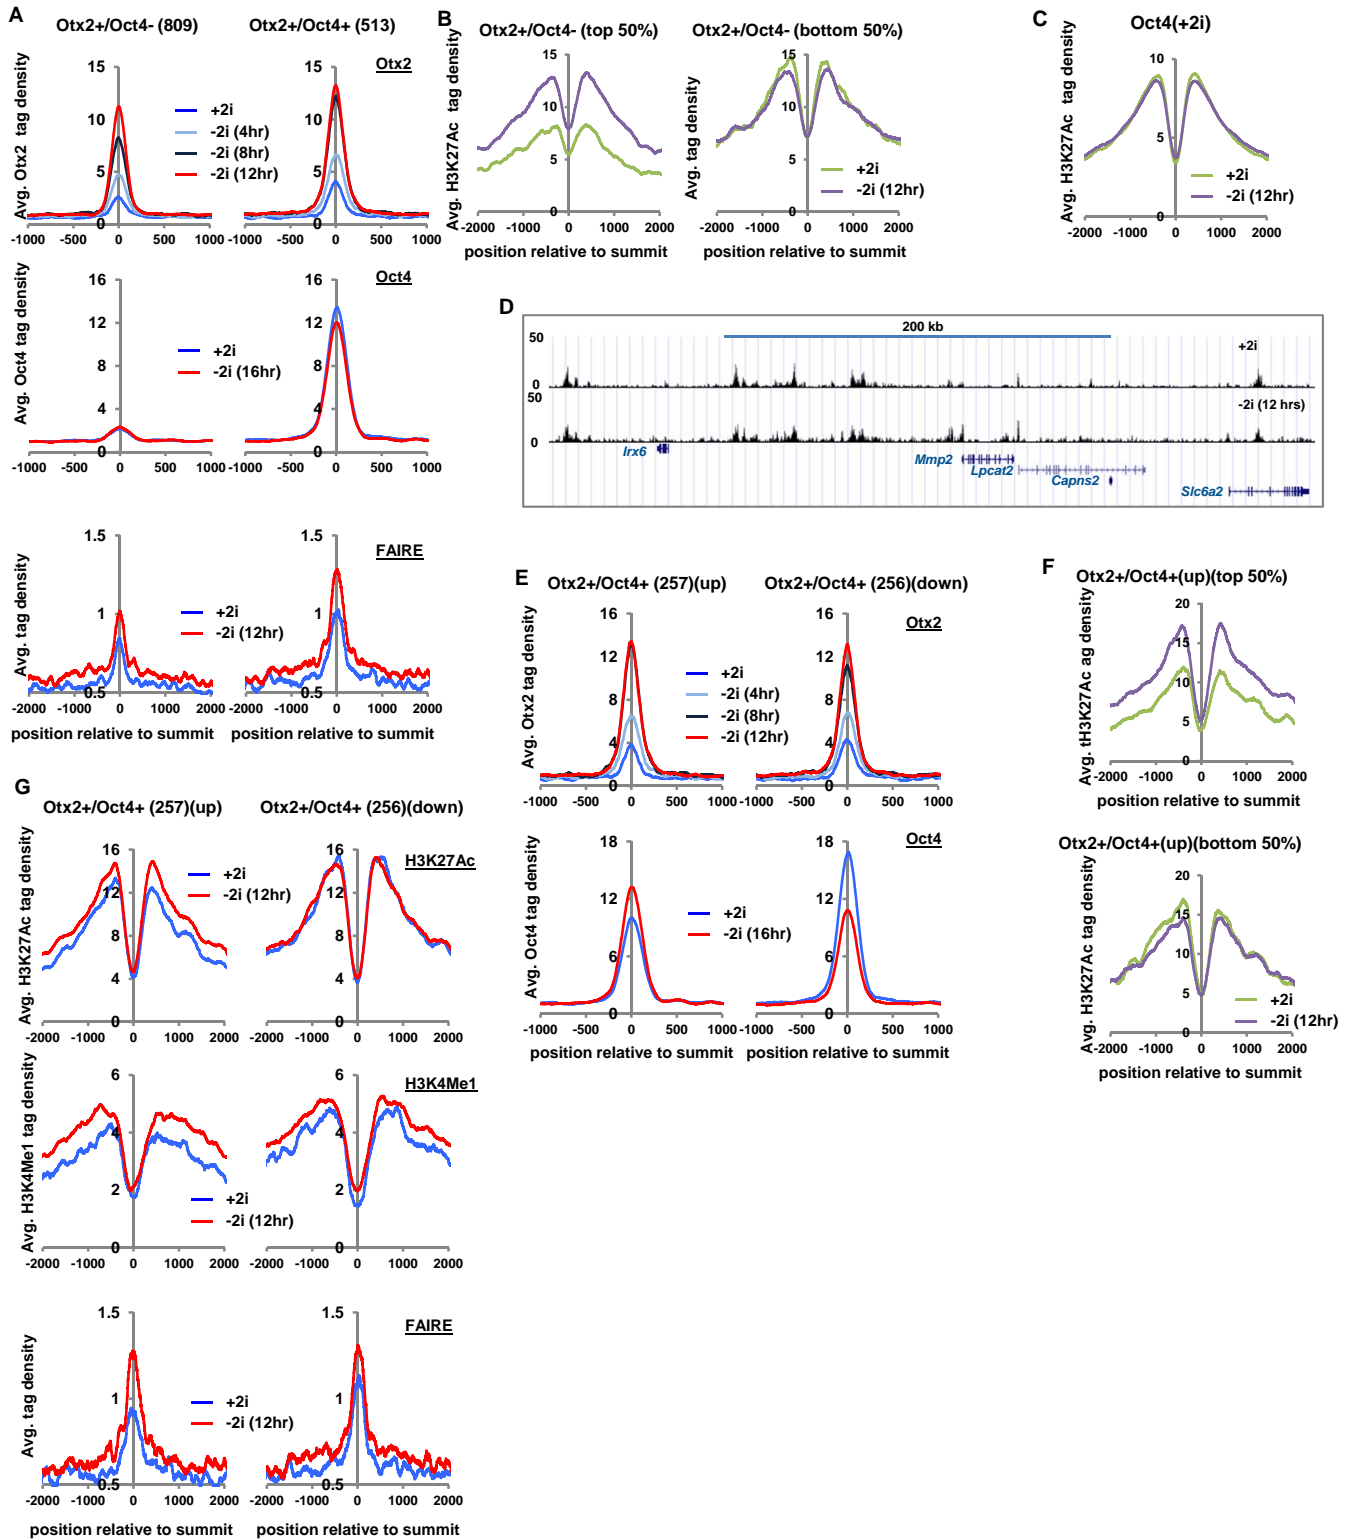

**Figure S3 (related to Figure 3). Differential properties of Otx2+/Oct4- and Otx2+/Oct4+ binding regions.** (A,B,E-G) Average tag density profiles showing the indicated ChIP-seq or FAIRE-seq data plotted onto the 2 or 4 kb regions respectively, surrounding the summits of Otx2 binding regions from; (A and B) the Otx2+/Oct4- and Otx2+/Oct4+ subgroups; (E, F and G) the Otx2+/Oct4+ subgroup showing increased (up) or no change/decreased (down) Oct4 binding 16 hrs after release from 2i. (C) Average tag density profiles showing the H3K27Ac ChIP-seq plotted onto the 4 kb regions surrounding the summits of all Oct4 binding regions found in "+2i" conditions. Average tag profiles are shown in the presence of 2i (+2i) or for the indicated times following 2i withdrawal. Numbers in brackets are the number of binding regions in each subgroup. In (B) and (F), the data is partitioned into the top and bottom 50% based on the fold change in H3K27Ac observed upon 2i withdrawal from the Otx2+/Oct4- and Otx2+/Oct4+ (up) subgroups respectively. (D) UCSC genome browser views of H3K27Ac binding profiles across a 400 kb region of chromosome 8 in the presence of 2i or upon release from 2i for 12 hrs.

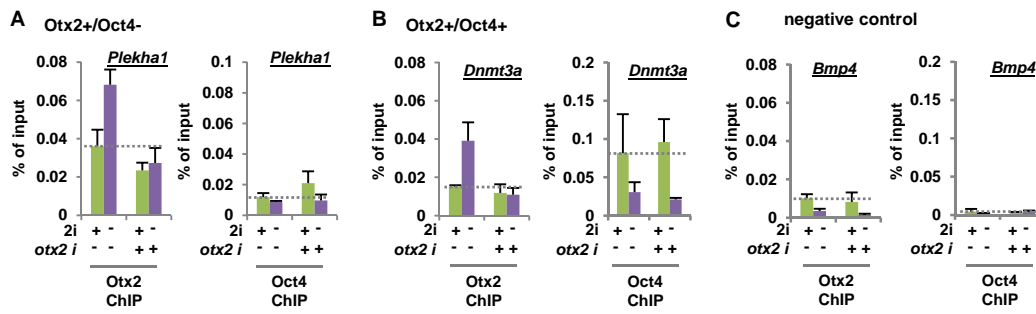

**Figure S4 (related to Figure 4). Otx2 and Oct4 binding to chromatin following Otx2 depletion.** ChIP-qPCR analysis of Otx2 and Oct4 binding to genomic regions associated with the indicated genes in mouse ES cells. Cells were maintained in 2i (+) or cultured in the absence of 2i (-) for 12 hrs in the presence of siRNAs against Otx2 (+) or control duplexes (-). Examples are given for the Otx2+/Oct4- dataset (A), Otx2+/Oct4+ dataset where increased Oct4 binding does not occur upon release from 2i (B) and a negative control region that lacks Oct4 and Otx2 binding peaks (C). Data are presented as means  $\pm$  SEM (n=3 (A & B) or n=2 (C)).

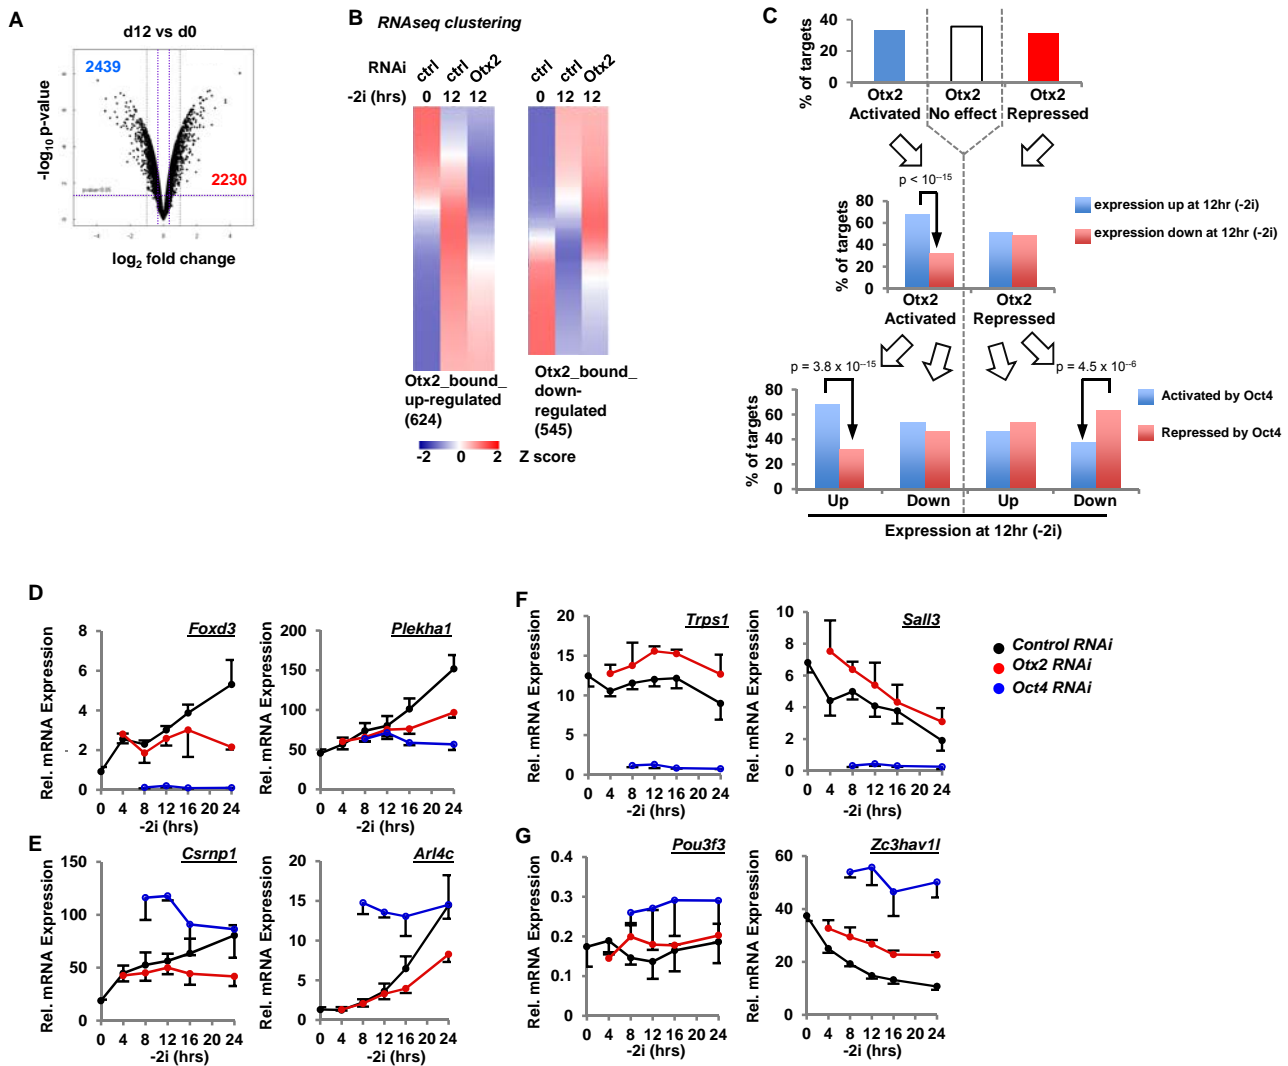

**Figure S5 (related to Fig. 5). Otx2 and Oct4 co-regulate target gene expression.** (A) Volcano plot of microarray data showing gene expression changes in mouse ES cells (*Rex1GFPd2*) cells in the presence (d12) or absence (d0) of “2i” withdrawal for 12 hrs. (B) Heatmap view of RNA-seq data showing the proportion of genes up or down regulated upon withdrawal of 2i from ES cells for 12 hrs, for subcategories of genes which are either activated (left) or repressed (right) by Otx2. (C) Summary of gene expression changes affected by Otx2 or Oct4 depletion 12 hr after 2i release from RNAseq experiments. Otx2 binding regions were linked to nearby genes and the top graph summarises the proportions of Otx2 targets which are activated, repressed or unchanged Otx2 (as determined by the effect of Otx2 depletion; >1.5 fold change). The expression of genes in these different subgroups was compared with their expression changes following release from 2i for 12 hrs (middle graph). Genes within these subgroups were then further partitioned according to their activation or repression by Oct4 (determined by expression changes following Oct4 depletion; >1.5 fold change). (D-G) RT-qPCR analysis using the Fluidigm system of mRNA expression of the indicated genes over a 24 hour time course following 2i withdrawal. Cells were treated with control, *Otx2* or *Oct4* siRNAs where indicated. Data are presented as means ± SD (n=3).

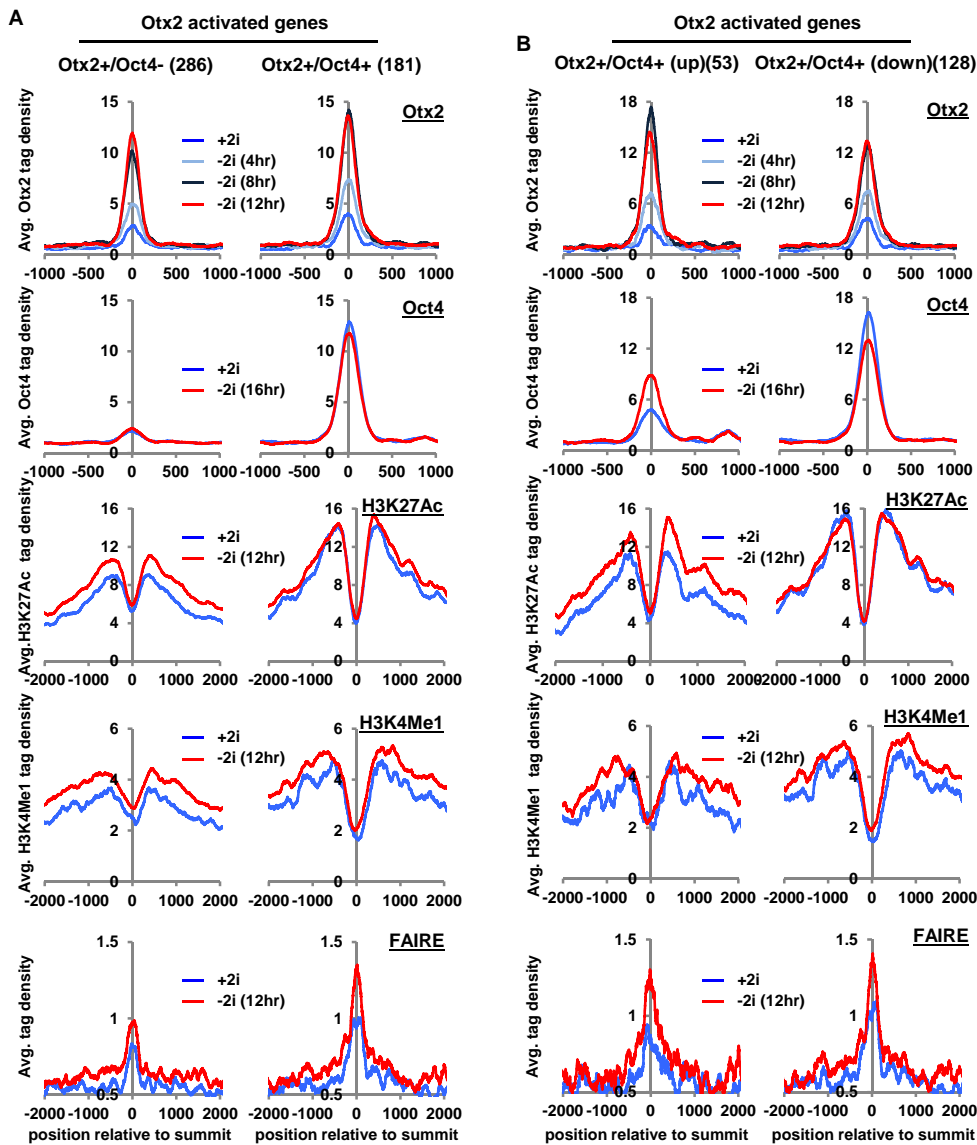

**Figure S6 (related to Fig. 6). Otx2 target gene activation correlations with changes in enhancer properties.** Average tag density profiles showing the indicated ChIP-seq or FAIRE-seq data plotted onto the 2 or 4 kb regions surrounding the summits (0 position on x-axis) of Otx2 binding regions associated with Otx2 activated genes and from the Oct4- and Oct4+ subgroups (A) or associated with Otx2 binding regions showing increased (up) or decreased/no change (down) in Oct4 binding (B). Data are shown in the presence of 2i (+2i) or for the indicated times following 2i withdrawal (-2i). Numbers in brackets represent the number of binding regions in each subgroup. Note that the Otx2 and H3K27Ac graphs are the same as in Fig.6 and are included here for comparative purposes.

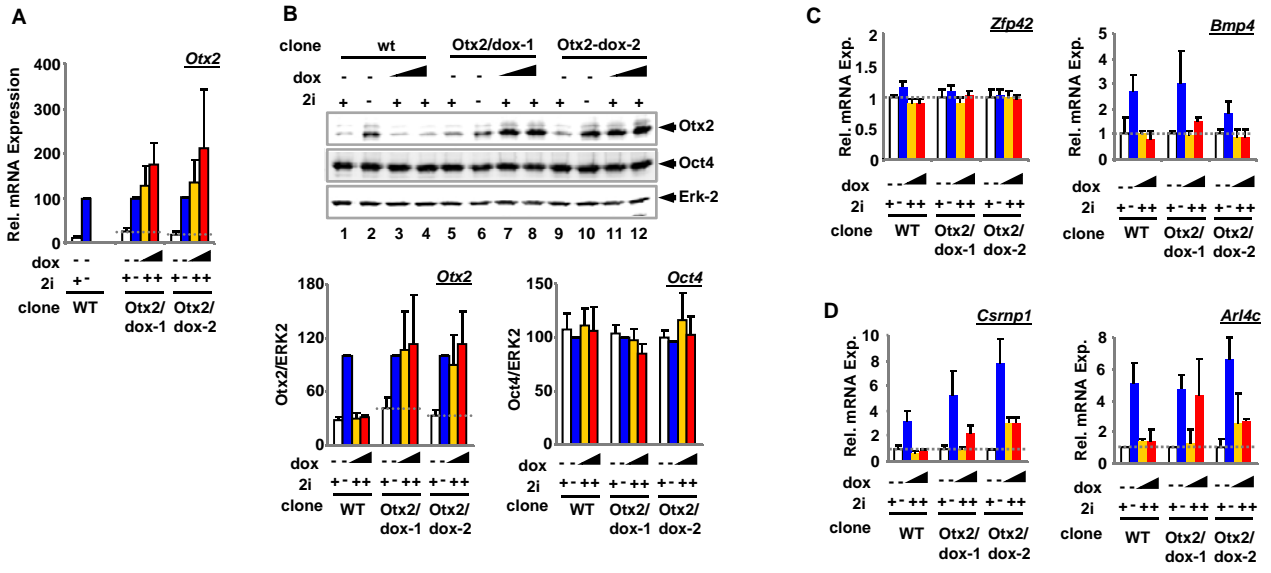

**Figure S7 (related to Fig. 7). Target gene expression in the presence of ectopic *Otx2* expression.** (A- C & D) RT-qPCR analysis of *Otx2* mRNA (A), negative control (C) or selected examples (D) using the Fluidigm system of mRNA expression of the indicated genes in WT (*Rex1GFPd2*), mESCs and two clonally derived cell lines, *Otx2/dox-1* and *Otx2/dox-2*, containing a doxycyclin-inducible *Otx2* transgene. Cells were maintained in 2i media and either left untreated or treated with increasing concentrations (10 and 100 ng/ml) of doxycycline (dox) for 24 hrs. Data are presented as means  $\pm$  SEM and are the average of at least three biological replicates ( $n \geq 3$ ). Gene expression following release from 2i for 12 hrs is also shown. (B) Immunoblots showing *Otx2* and *Oct4* levels in WT (*Rex1GFPd2*), mESCs and two clonally derived cell lines, *Otx2/dox-1* and *Otx2/dox-2*, containing a doxycyclin-inducible *Otx2* transgene. Cells were maintained in 2i media and either left untreated or treated with increasing concentrations (10 and 100 ng/ml) of doxycycline (dox) for 24 hrs. Quantification of the data from (B) is shown below and are normalised for Erk2 levels and presented as means  $\pm$  SEM ( $n=3$ ).



**Supplementary Table 1 : Oligonucleotide primers**

Primers for ChIP analysis

| ADS_ID | primer_name | primer_F             | ADS_ID | primer_name | primer_R                  | amplicon |
|--------|-------------|----------------------|--------|-------------|---------------------------|----------|
| 4137   | hells_F     | CAC TTCCTCCCCAGCTACT | 4138   | hells_R     | GGAA GCCTACCTCCAGGAAT     | 130      |
| 4139   | plekha1_F   | GGGGATTTGAGCAGGTGATA | 4140   | plekha1_R   | GAGAAAGGTGGGACAGGACA      | 127      |
| 4141   | gm98_F      | GCAGACAGGATCGGAATCTC | 4142   | gm98_R      | GAGCCCTGGGTTTACCATT       | 164      |
| 4143   | csmp1_F     | AGACCAGGAGCTTACCAGA  | 4144   | csmp1_R     | CAGCAGGGAATAGGACAAG       | 127      |
| 4145   | slc16a3_F   | TTCCCACTGCGTTTTATTCC | 4146   | slc16a3_R   | TGGGGTTGCATCCTATTCTT      | 155      |
| 4147   | dnmt3a_2_F  | GAAGCCTGGAAAGCTCACAG | 4148   | dnmt3a_2_R  | ATGCAACGATGGGTGGTTAT      | 176      |
| 4149   | foxd3_F     | AGATTGCTGCCGTGTTTTCT | 4150   | Roxd3_R     | CCTGGTCTGTAAGGCATT        | 167      |
| 4151   | yes1_F      | CAAAAAGTTTCCGTCAGAGC | 4152   | yes1_R      | TCAAAGACATAAAAAGGAAGCCAAA | 123      |
| 4153   | sgk1_F      | CCTCCCACTTCACTTTCCAC | 4154   | sgk1_R      | CCACCTACAAGTTCCCAAA       | 120      |
| 4155   | pim2_F      | TTGACCATTTGCCTCCTTCT | 4156   | pim2_R      | TAATGAGCTGCCCCAGCTT       | 157      |
| 4157   | bmp4_F      | ACAGCTCCTGGAGGCAGTTA | 4158   | bmp4_R      | CCACGGCTTTGGTTGATAGT      | 171      |

Primers for expression analysis

| ADS_ID | primer_name | primer_F                 | ADS_ID | primer_name | primer_R                 | amplicon |
|--------|-------------|--------------------------|--------|-------------|--------------------------|----------|
| 4159   | otx2_F      | GGAGAGGACGACATTTACTAGG   | 4160   | otx2_R      | TTCTGACCTCCATTCTGCTG     | 197      |
| 4161   | tal2_F      | CCTAGCAAGAAAGGAACTGGA    | 4162   | tal2_R      | GATATACCTCATTGCCAAGCGA   | 174      |
| 4163   | hesx1_F     | ATGTCCTTTAGAGTAACTGCTACC | 4164   | hesx1_R     | GAAGTGTGATTCTCTACGGGAC   | 143      |
| 4167   | pou3f1_F    | TTTGTATGCCCGACTAAACC     | 4168   | pou3f1_R    | ACAGATGAAGAAATGGTGAAGG   | 117      |
| 4169   | foxd3_F     | TCTACCCAATCCTGGACTCTG    | 4170   | foxd3_R     | GAAGATTATTCCAGCGGAC      | 125      |
| 4171   | dnmt3a_F    | GCGATTTCTTGAGTCTAACC     | 4172   | dnmt3a_R    | TTGCTGAACCTGGCTATTCTG    | 176      |
| 4175   | gm98_F      | GAGCAGTCACAGTCAGACAG     | 4176   | gm98_R      | CACCACCAGCATGAAATACCT    | 176      |
| 4177   | hells_F     | GTTTAGTTGATGGGAATGGAGAG  | 4178   | hells_R     | CTTCTACACAAAGACTCGTAGTGG | 170      |
| 4179   | csmp1_F     | CCTTAGCTGAGTTTACACAGGA   | 4180   | csmp1_R     | TGCCAAGTCTCCTCTACAG      | 184      |
| 4181   | fgf15_F     | GAAGACGATTGCCATCAAGGA    | 4182   | fgf15_R     | CTAAACAGTCCATTTCTCCCT    | 127      |
| 4183   | plekha1_F   | AACAGAGTGACATAATGATGAGGG | 4184   | plekha1_R   | AGAGACTGCTTTAATCCAAGTGTG | 115      |
| 4185   | slc16a3_F   | GCTATGCTCTATGGCAGAGG     | 4186   | slc16a3_R   | AGGGAAGGCTGGAAAGTTGAG    | 196      |
| 4187   | lima1_F     | AAACACAGAAACTTTCAGGCA    | 4188   | lima1_R     | CACCTATTTCCAGTCATCCA     | 175      |
| 4189   | arl4c_F     | GCAACATCTCCTCCAACATCTC   | 4190   | arl4c_R     | GCTCAGTTTGATCTTCTCGGT    | 160      |
| 4191   | irgm1_F     | CACTCGGATCTTATCATGAAACCA | 4192   | irgm1_R     | CCTTCTCTTAAAGCTCTTTCGG   | 181      |
| 4195   | capn3_F     | CTTCCATCTCAACGACCAACTC   | 4196   | capn3_R     | GATACCATCGCCATCCTTGTG    | 153      |
| 4197   | skor1_F     | GGGCTCAGCTTTGGATGTCAC    | 4198   | skor1_R     | GTTGCACCATTTCTCCCGA      | 195      |
| 4199   | fgf5_F      | GGGATTGTAGGAATACGAGGA    | 4200   | fgf5_R      | CCTGAACCTACAGTCATCCGT    | 104      |
| 4203   | zfp521_F    | CCTGAGCGGATCACAGAG       | 4204   | zfp521_R    | TTCTCTCCGAAATCACACC      | 157      |
| 4205   | spic_F      | ACGCCATTGACATATTGATCCA   | 4206   | spic_R      | GCAGAACCATTGTTACACCT     | 177      |
| 4211   | car12_F     | ACTACACTCCTTGCTACCC      | 4212   | car12_R     | CAGCCTCTCATCGAACTTCTG    | 176      |
| 4215   | zc3hav11_F  | AGATGCTTGAAGAGAAAGACC    | 4216   | zc3hav11_R  | GCTCGTTCAAGTTTATTGGG     | 145      |
| 4217   | pou3f3_F    | CCCTCTTCTTCCACTTCTTCC    | 4218   | pou3f3_R    | CTCTGTTTCTCCCTTCTTCCC    | 200      |
| 4219   | nr3c1_F     | GCAGAGAATGACTCTACCCT     | 4220   | nr3c1_R     | CCTGGCTCTTCAGACCTTCC     | 157      |
| 4221   | sall3_F     | AAGACCTTCTCCTCAGCCAG     | 4222   | sall3_R     | ATGTGTACCTTGAGATTGCCCT   | 121      |
| 4223   | trps1_F     | AGTTCAGCCATTCCAAAGAC     | 4224   | trps1_R     | GTTCTCCTGAAGTACCTG       | 129      |
| 4227   | tbp_F       | TACTGAAGAAAGGAGAATCATGG  | 4228   | tbp_R       | GAGACTGTTGGTGTCTGAATAGG  | 166      |
| 4229   | gapdh_F     | ACATCAAGAAAGGTGGTGAAGCAG | 4230   | gapdh_R     | GAAGGTGGAAAGTGGGAGTTG    | 116      |
| 4237   | ywhaz_F     | TATTGAGCAGAAAGCGGAAGG    | 4238   | ywhaz_R     | GCCAAGTAACGGTAGTAGTCAC   | 197      |
| 4239   | tubb5_F     | CTTCAGACAGACAACCTCGT     | 4240   | tubb5_R     | GCACCACATCCAAGACAGAG     | 109      |
| 4241   | pgk1_F      | GAAGATTACCTTGCTGTTGAC    | 4242   | pgk1_R      | GCTCTCAGTACCACAGTCCA     | 126      |
| 4243   | ppia_F      | ACTTCATCTTAAAGCATACAGGTC | 4244   | ppia_R      | CTTCCACAATGTTTCATGCCT    | 161      |
| 4245   | bmp4_F      | AACACTGTGAGGAGTTTCCA     | 4246   | bmp4_R      | GTTTATACGGTGGAAAGCCCT    | 194      |
| 4247   | Oct4_F      | GTGAAGTTGGAGAAGGTGGA     | 4248   | Oct4_R      | GCTGAACACCTTTCCAAGAG     | 170      |
| 4249   | nanog_F     | TTACAAGGGTCTGCTACTGAG    | 4250   | nanog_R     | TTCTGCTTCTGAAACCTGTC     | 244      |
| 4251   | klf4_F      | AGTTCTCATCTCAAGGCACAC    | 4252   | KLF4_R      | CACACTTCTGGCACTGAAAGG    | 157      |
| 4253   | pcf711_F    | TCCTTCTCCCATAGTTGTCCC    | 4254   | pcf711_R    | GCAGCCATTAACCAAACTCT     | 148      |
| 4255   | rex-1_F     | GAAATGGACTAAGAGCTGGGA    | 4256   | rex-1_R     | TGAACAATGCCTATGACTCAC    | 212      |

Primer for Plasmid constructs

| ADS_ID | primer_name | primer_F                          | ADS_ID | primer_name | primer_R                            | amplicon |
|--------|-------------|-----------------------------------|--------|-------------|-------------------------------------|----------|
| 4257   | Inf_OTX2_F  | CCCAGGACCGACCGGTATGATGCTTATCTAAAG | 4258   | Inf_OTX2_R  | CAGGTCCGGAAGTGTTCACAAAACCTGGAATTTCC | 870      |
| 4259   | Inf_TRE3G_F | TGTTTCTCAGGTTACTTCAAGAATTCCTCGAG  | 4260   | Inf_TRE3G_R | CGCCTAGGCAGTCTGACTTTACGAGGGTAGGAAG  | 380      |
| 4261   | ROSA26_F    | CACCGTGTGGGCGTTGTCTGTC            | 4262   | ROSA26_R    | AAACGACAGACAACGCCACACAC             | N/A      |
| 4163   | ROSA26.2_F  | CACCGTGGCAGGAAGCGCGCGCTG          | 4164   | ROSA26.2_R  | AAACGACGCGCGCTTCTGCCAC              | N/A      |
| 4165   | ROSA26.3_F  | CACCCGGCCAGACTCTGCGCGCCG          | 4166   | ROSA26.3_R  | AAACGCGCCGAGAGTCTGGCCG              | N/A      |

## Supplemental Experimental procedures

### *Generation of “ knock-in-inducible-Otx2” ES cell lines*

pAS4428 [pEntL1L3-CAG-Tet3G (Tet3G expression under the control of CAG promoter)] was constructed by ligating an EcoRV/MfeI fragment of pAS4427 [pCAG-Tet3G] into PacI (blunted by fill in)/MfeI sites of pAS4426 [pEntL1L3-EF1 $\alpha$ -rtTA2Sm2] vector. pAS4426 [pEntL1L3-EF1 $\alpha$ -rtTA2Sm2] was constructed by ligating an AflIII/SbfI fragment from pAS4425 [pEntL1L3-EF1 $\alpha$ -rtTA-2 (Addgene 26803)] into the same sites of pAS4424 [pEntL1L3-rtTA-3 (Addgene 27106)]. pAS4431 [pEntR3L2-TRE3G-mCherry-otx2] was generated by mixing a PCR product encoding Otx2 with AgeI/SpeI cut vector pAS4430 [(pEntR3L2-TRE3G-mCherry-Rs1-2)] using in fusion technology. pAS4430 [pEntR3L2-TRE3G-mCherry\_Rs1-2] was generated by mixing a TRE3G PCR product with the PacI/SalI digested vector pAS4429 [(pEntR3L2-tetO (sh)-mCherry-Rs1-2, Addgene 24417)]. pAS4433 [R26(CAG-Tet3G-TRE3G-mCherry-otx2)] was constructed by mixing pAS4428 [pEntL1L3-CAG-Tet3G], pAS4431 [pEntR3L2-TRE3G-mCherry-otx2] and pAS4432 [pR26 R1R2 RexNeo PI-SceI (Addgene 24418)] plasmids using Gateway system (LR clonase II plus). pAS4435-4437 [pX335-Rosa26, pX335-Rosa26.3 and pX335-Rosa26.3] were constructed by cloning the oligo duplexes encoding the guide RNAs (ADS4261/2, ADS4163/4 and ADS4165/6 respectively) for the Rosa26 locus into a BbsI-digested pAS4434 [pX335 vector (Addgene 42335)]. All plasmids were validated by sequencing.

8  $\mu$ g of R26(CAG-Tet3G-TRE3G-mCherry-otx2 with either 2  $\mu$ g of pX335-Rosa26 plasmid (to create Otx2/dox-1/-2 lines) or 4  $\mu$ g of pX335-Rosa26.2 and pX335-Rosa26.3 plasmids (to create Otx2/dox-3 line) were transfected using Amaxa (A-013 setting) into  $2 \times 10^6$  *Rex1GFPd2* mES cells. Cells were selected with 600  $\mu$ g/ml of geneticin (G418) for 12 days. Individual cells were cloned by serial dilution and propagated in G418/“+2i” media.

Integration of the expression cassette was verified by inverted PCR followed by sequencing (Otx2/dox-1/-2) or Southern blotting Otx2/dox-3).
